# Supplementary material for: Quantum anomalous Hall effect with a high and tunable Chern number in monolayer NdN2
Source: Royal Society of Chemistry journal article supplement (doi:10.1039/d3cp01010d), 2023-01-01
Supplement: d3cp01010d1.pdf [file d3cp01010d1.pdf]

### Electronic Supplementary Information for

## Quantum anomalous Hall effect with high and tunable Chern number in monolayer NdN<sub>2</sub>

Shengshi Li,<sup>a,†</sup> Xinyang Li,<sup>b,†</sup> Weixiao Ji,<sup>a,\*</sup> Ping Li,<sup>a</sup> Shishen Yan,<sup>a</sup> and Changwen Zhang<sup>a,\*</sup>

<sup>a</sup> Spintronics Institute & School of Physics and Technology, University of Jinan, Jinan, Shandong, 250022, People's Republic of China. E-mail: hellojiweixiao@163.com; E-mail: ss\_zhangchw@ujn.edu.cn

<sup>b</sup> School of Physics, Southeast University, Nanjing, Jiangsu, 211100, People's Republic of China.

<sup>†</sup> These authors contributed equally to this work.

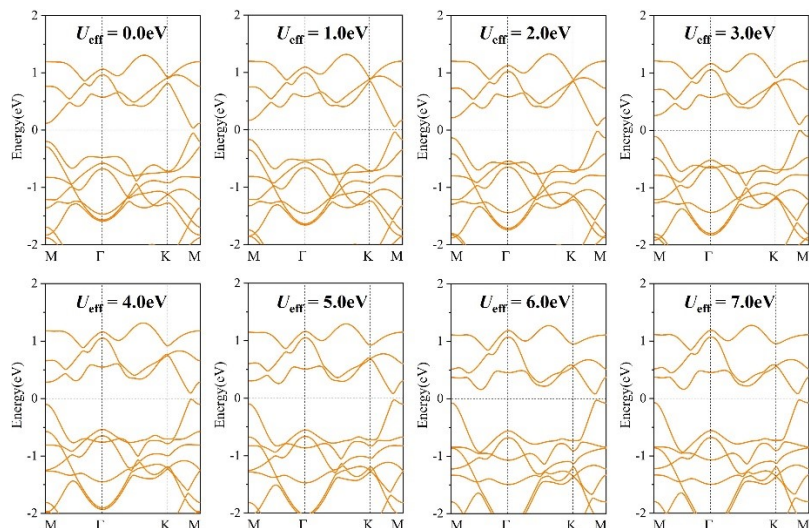

**Fig. S1** Calculated SOC band structures of monolayer NdN<sub>2</sub> with different  $U_{\text{eff}}$ .

**Table S1** Calculated lattice constant  $a$ , local magnetic moment of Nd atom  $M_{\text{Nd}}$ , sum of local magnetic moment of two N atoms  $M_{\text{N}_2}$ , and total magnetic moment per unit cell  $M_{\text{tot}}$  of monolayer NdN<sub>2</sub> using different pseudopotential for Nd atom.

|                                             | $a$ (Å) | $M_{\text{Nd}}$ ( $\mu_{\text{B}}$ ) | $M_{\text{N}_2}$ ( $\mu_{\text{B}}$ ) | $M_{\text{tot}}$ ( $\mu_{\text{B}}$ ) |
|---------------------------------------------|---------|--------------------------------------|---------------------------------------|---------------------------------------|
| NdN <sub>2</sub> ( $5s^25p^65d^16s^2$ )     | 3.93    | 0.06                                 | 2.94                                  | 3.00                                  |
| NdN <sub>2</sub> ( $5s^26s^25p^65d^14f^3$ ) | 3.92    | 0.13                                 | 2.87                                  | 3.00                                  |

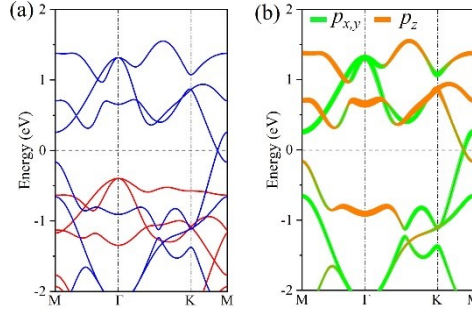

**Fig. S2** Spin- and orbital-resolved band structures without SOC of monolayer NdN<sub>2</sub> obtained from GGA+*U* scheme with specific parameters of  $U = 7.2$  eV and  $J = 1.0$  eV implemented for the Nd-4*f* orbitals.

**Table S2** Slater-Koster TB parameters for hexagonal lattice with lattice constant  $a = 3.65\text{\AA}$  and interlayer distance  $d = 1.77\text{\AA}$ . The unprimed and primed parameters correspond to nearest and next-nearest neighbor hoppings, respectively.

| $\epsilon_s$ | $\epsilon_{p_x, p_y}$ | $\epsilon_{p_z}$ | $V_{ss\sigma}$ | $V_{sp\sigma}$ | $V_{pp\sigma}$ | $V_{pp\pi}$ | $V'_{pp\sigma}$ | $V'_{pp\pi}$ |
|--------------|-----------------------|------------------|----------------|----------------|----------------|-------------|-----------------|--------------|
| -2.8         | -2.39                 | -2.41            | -0.15          | -1.94          | -1.90          | -0.55       | -0.6            | -0.2         |

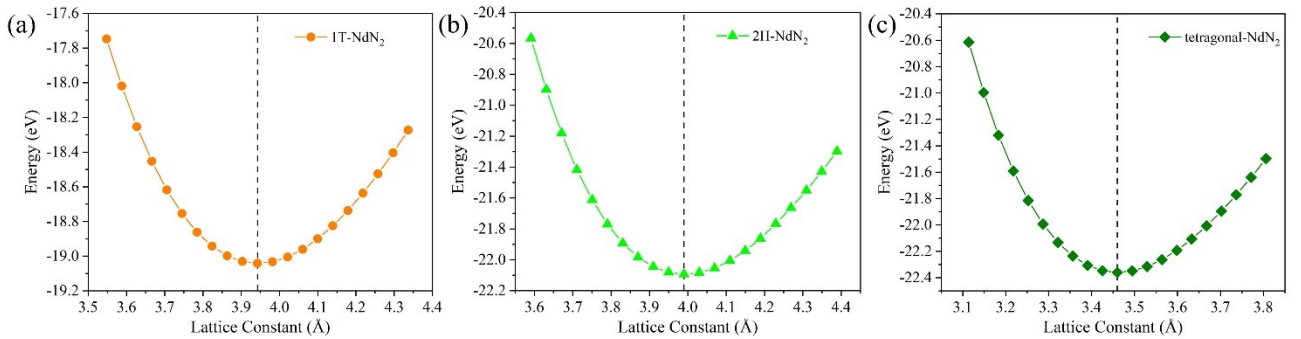

**Fig. S3** Variation of energy as a function of lattice constant for monolayers 1T-NdN<sub>2</sub> (a), 2H-NdN<sub>2</sub> (b), and tetragonal-NdN<sub>2</sub> (c).

### Part I: The MAE of monolayer NdN<sub>2</sub>

Here, a detailed analysis is conducted on the magnetic anisotropy energy (MAE) of monolayer NdN<sub>2</sub>. The angular dependence of MAE can be expressed as follows:

$$MAE(\theta, \varphi) = K_1 \cos^2 \theta + K_2 \cos^4 \theta + K_3 \cos^4 \varphi$$

where  $K_1$  and  $K_2$  are anisotropy constants, while  $\theta$  and  $\varphi$  are polar and azimuth angles in the spherical coordinates, respectively. By fitting the MAE results shown in Fig. S3(a), we can obtain the anisotropy constants, *i.e.*,  $K_1 = 143 \mu\text{eV}$ ,  $K_2 = 35 \mu\text{eV}$ , and  $K_3 = 0 \mu\text{eV}$ . The positive value of  $K_1$  indicates that monolayer NdN<sub>2</sub> exhibits an out-of-plane magnetic anisotropy with its easy magnetization axis along the  $c$  axis. While  $K_3 = 0$  implies isotropic magnetization in the  $xy$  plane. Figure S3(b) displays a spherical plot of the MAE arising from magnetization rotation, in which the out-of-plane magnetization is more energetically favorable than the in-plane magnetization by  $171 \mu\text{eV/u.c.}$

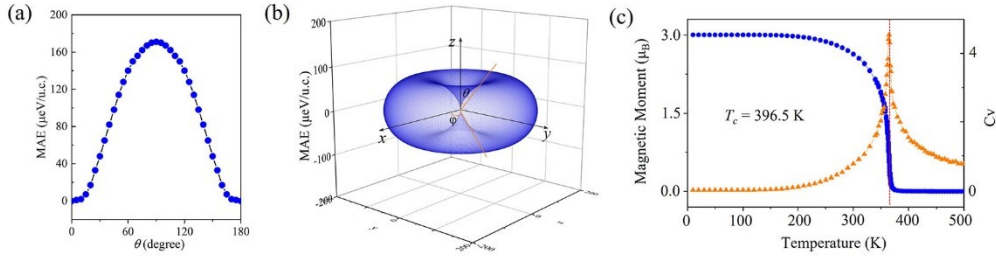

**Fig. S4** (a) Polar angular dependence of MAE for monolayer NdN<sub>2</sub>. (b) Magnetic anisotropy of NdN<sub>2</sub> through the whole space. (c) Variations of moment and  $C_v$  as a function of temperature.

### Part II: The Curie temperature of monolayer NdN<sub>2</sub>

Here, the Curie temperature ( $T_C$ ) of monolayer NdN<sub>2</sub> is evaluated in detail. We first calculate exchange coupling parameters between nearest, next-nearest, and next-next-nearest neighbors ( $J_1$ ,  $J_2$ , and  $J_3$ ) using different magnetic configurations in relation to the Ising model:

$$H = -\sum_{i,j} J_1 M_i M_j - \sum_{k,l} J_2 M_k M_l - \sum_{m,n} J_3 M_m M_n \quad (\text{S2})$$

where  $M$  is the net magnetic moment at the N site  $i$ , while  $(i, j)$ ,  $(k, l)$ , and  $(m, n)$  run over the nearest, next-nearest and next-next-nearest N atoms. The obtained  $J_1$  and  $J_2$  are 8.4 meV and 1.4 meV, respectively. However, the value of  $J_3$  is only 0.13 meV, which is negligible and can be disregarded. The  $T_C$  is estimated through Monte-Carlo (MC) simulation on a  $200 \times 200$  supercell for  $1 \times 10^9$  loops, based on the Ising Hamiltonian. Figure S3(c) presents the evolution of magnetic moment per unit cell with increasing temperature. It should be noted that the magnetic moment decreases to  $0.0 \mu_B$  when the temperature exceeds 396 K. Furthermore, we also calculate the heat capacity ( $C_v$ ) expressed as:

$$C_v = \lim_{\Delta T \rightarrow 0} \frac{\Delta E_T}{\Delta T} \quad (\text{S3})$$

where  $\Delta E_T$  is the variation of total energy as the temperature increases from  $T$  to  $T + \Delta T$ . According to the simulated  $C_v$  curve shown in Fig. S3(c), it can be inferred that the 2D NdN<sub>2</sub> exhibits a  $T_C$  of 396.5 K, indicating its potential application

in spintronic devices operating at room temperature.

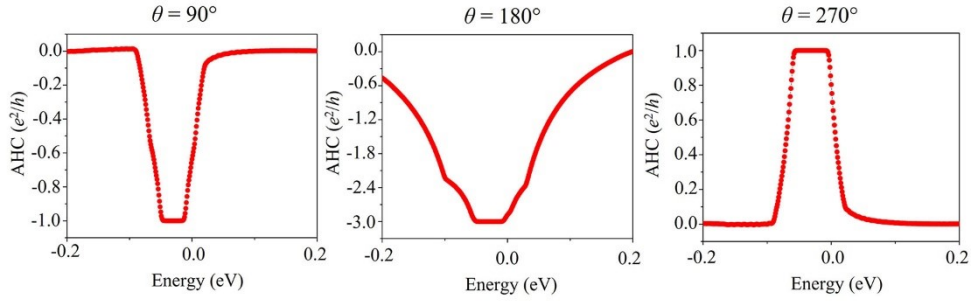

**Fig. S5** Calculated AHC  $\sigma_{xy}$  as a function of Fermi level for the cases of  $\theta = 90^\circ$ ,  $\theta = 180^\circ$ , and  $\theta = 270^\circ$ , respectively. The corresponding Chern numbers are  $C = -1$ ,  $C = -3$ , and  $C = 1$ .

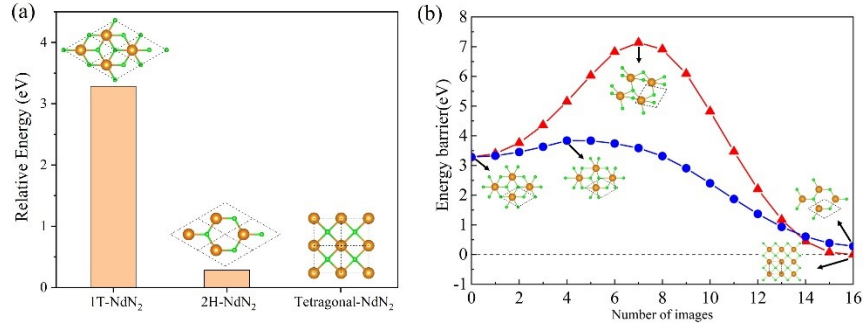

**Fig. S6** (a) Relative energy of 2D allotropes of  $\text{NdN}_2$ . (b) Energy curve along the structural phase transition paths of 1T-2H and 1T-tetragonal predicted by the c-NEB method.

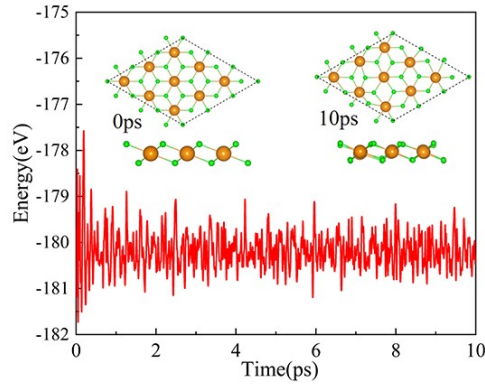

**Fig. S7** Variation of total energy during 10ps AIMD simulation of monolayer 1T- $\text{NdN}_2$ . Inserts show the initial and final structures of monolayer 1T- $\text{NdN}_2$  after 10ps at 300 K.

**Table S3** The lattice constant  $a$ , bond length of Nd-N  $d$ , N-N distance along the  $z$  axis  $h$ , and total magnetic moment per unit cell  $M_{\text{tot}}$  of monolayer NdN<sub>2</sub> with 1T, 2H, and tetragonal phases.

|                             | $a$ (Å) | $d$ (Å) | $h$ (Å) | $M_{\text{tot}}$ ( $\mu_B$ ) |
|-----------------------------|---------|---------|---------|------------------------------|
| 1T-NdN <sub>2</sub>         | 3.93    | 2.43    | 1.78    | 3.00                         |
| 2H-NdN <sub>2</sub>         | 3.99    | 2.41    | 1.70    | 0.15                         |
| Tetragonal-NdN <sub>2</sub> | 3.46    | 2.53    | 1.37    | 0.00                         |

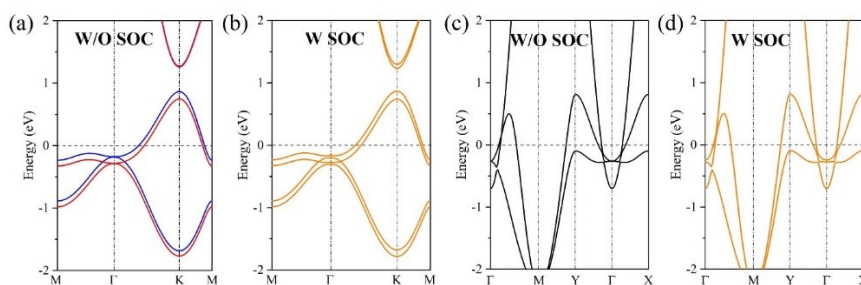

**Fig. S8** Band structures of 1T-NdN<sub>2</sub> (a-b) and tetragonal-NdN<sub>2</sub> (c-d) monolayers without and with SOC. The red and blue lines represent the spin-up and spin-down states, respectively.
